# Supplementary figures and images for: Serum anti-Mullerian hormone predicts ovarian response in (Macaca fascicularis) monkeys
Source: PubMed Central journal article supplement — Endocr Connect. 2018 Aug 3;7(9):983–9. doi: 10.1530/EC-18-0189 (PMC6176281; doi:10.1530/ec-18-0189), 2018-08-03

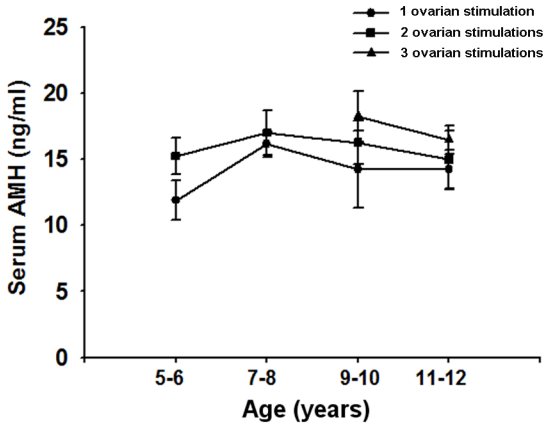

Supplement: ec-7-983-s001.pdf [file ec-7-983-s001.pdf]
